# Supplementary material for: Buccal Bone Thickness in Anterior and Posterior Teeth—A Systematic Review
Source: MDPI journal article supplement (doi:10.3390/healthcare9121663), 2021-11-30
Supplement: s1 [file s1]

**Table S1.** Search command.

| Database | Search Command                                                                                                                                                                                                                                                                                                                                                                                                                                                                                                                                                                                                                                                                                                                                                                                                                                                                                                                                                                                                                                                                                                                                                                                                                                                                                                                                                                                                                                                                                                                                                                                                                                                                                                                                                                                                                                                                                                                                                                                                                                                                                                                                                                                                                                                                                                                                                                                                                                                                                                                                                                                                                                                                                                                                                                                                                                                                                                                                                                                                                                                                                                                                                                                                                                                                                                                                                                                  |
|----------|-------------------------------------------------------------------------------------------------------------------------------------------------------------------------------------------------------------------------------------------------------------------------------------------------------------------------------------------------------------------------------------------------------------------------------------------------------------------------------------------------------------------------------------------------------------------------------------------------------------------------------------------------------------------------------------------------------------------------------------------------------------------------------------------------------------------------------------------------------------------------------------------------------------------------------------------------------------------------------------------------------------------------------------------------------------------------------------------------------------------------------------------------------------------------------------------------------------------------------------------------------------------------------------------------------------------------------------------------------------------------------------------------------------------------------------------------------------------------------------------------------------------------------------------------------------------------------------------------------------------------------------------------------------------------------------------------------------------------------------------------------------------------------------------------------------------------------------------------------------------------------------------------------------------------------------------------------------------------------------------------------------------------------------------------------------------------------------------------------------------------------------------------------------------------------------------------------------------------------------------------------------------------------------------------------------------------------------------------------------------------------------------------------------------------------------------------------------------------------------------------------------------------------------------------------------------------------------------------------------------------------------------------------------------------------------------------------------------------------------------------------------------------------------------------------------------------------------------------------------------------------------------------------------------------------------------------------------------------------------------------------------------------------------------------------------------------------------------------------------------------------------------------------------------------------------------------------------------------------------------------------------------------------------------------------------------------------------------------------------------------------------------------|
| Pubmed   | <p>(("alveolar bone"[Title/Abstract] OR "alveolar plate"[Title/Abstract] OR (("alveolar"[All Fields] OR "alveolarization"[All Fields] OR "alveolars"[All Fields]) AND "shelf"[Title/Abstract]) OR "buccal bone"[Title/Abstract] OR "buccal plate"[Title/Abstract] OR "buccal shelf"[Title/Abstract] OR "facial bone"[Title/Abstract] OR "facial plate"[Title/Abstract] OR (("face"[MeSH Terms] OR "face"[All Fields] OR "facial"[All Fields] OR "facials"[All Fields]) AND "shelf"[Title/Abstract]) OR "bundle bone"[Title/Abstract] OR "alveolar crest"[Title/Abstract] OR "alveolar ridge"[Title/Abstract] OR "alveolar bone thickness"[Title/Abstract] OR "alveolar bone width"[Title/Abstract] OR (("alveolar"[All Fields] OR "alveolarization"[All Fields] OR "alveolars"[All Fields]) AND "plate thickness"[Title/Abstract]) OR (("alveolar"[All Fields] OR "alveolarization"[All Fields] OR "alveolars"[All Fields]) AND "plate width"[Title/Abstract]) OR (((("alveolar"[All Fields] OR "alveolarization"[All Fields] OR "alveolars"[All Fields]) AND "shelf"[All Fields]) AND "thickness"[Title/Abstract]) OR ((("alveolar"[All Fields] OR "alveolarization"[All Fields] OR "alveolars"[All Fields]) AND "shelf width"[Title/Abstract]) OR "buccal bone thickness"[Title/Abstract] OR "buccal bone width"[Title/Abstract] OR "buccal plate thickness"[Title/Abstract] OR "buccal plate width"[Title/Abstract] OR (((("buccal"[All Fields] OR "buccally"[All Fields]) AND "shelf"[All Fields]) AND "thickness"[Title/Abstract]) OR ((("buccal"[All Fields] OR "buccally"[All Fields]) AND "shelf width"[Title/Abstract]) OR "facial bone thickness"[Title/Abstract] OR ((("face"[MeSH Terms] OR "face"[All Fields] OR "facial"[All Fields] OR "facials"[All Fields]) AND "bone width"[Title/Abstract]) OR "facial plate thickness"[Title/Abstract] OR ((("face"[MeSH Terms] OR "face"[All Fields] OR "facial"[All Fields] OR "facials"[All Fields]) AND "plate width"[Title/Abstract]) OR (((("face"[MeSH Terms] OR "face"[All Fields] OR "facial"[All Fields] OR "facials"[All Fields]) AND "shelf"[All Fields]) AND "thickness"[Title/Abstract]) OR ((("face"[MeSH Terms] OR "face"[All Fields] OR "facial"[All Fields] OR "facials"[All Fields]) AND "shelf width"[Title/Abstract]) OR ((("bundle"[All Fields] OR "bundle s"[All Fields] OR "bundled"[All Fields] OR "bundles"[All Fields] OR "bundling"[All Fields]) AND "bone thickness"[Title/Abstract]) OR ((("bundle"[All Fields] OR "bundle s"[All Fields] OR "bundled"[All Fields] OR "bundles"[All Fields] OR "bundling"[All Fields]) AND "bone width"[Title/Abstract]) OR "alveolar crest thickness"[Title/Abstract] OR "alveolar crest width"[Title/Abstract] OR "alveolar ridge thickness"[Title/Abstract] OR "alveolar ridge width"[Title/Abstract]) AND ("Tooth"[Title/Abstract] OR "Teeth"[Title/Abstract] OR "maxilla*"[Title/Abstract] OR "mandib*"[Title/Abstract] OR "Incisor"[Title/Abstract] OR "Canine"[Title/Abstract] OR "Premolar"[Title/Abstract] OR "Molar"[Title/Abstract]) AND ("cone beam computed tomography"[MeSH Terms] OR "CT"[Title/Abstract] OR "CBCT"[Title/Abstract] OR "Tomography"[Title/Abstract] OR "cone beam computed tomography"[Title/Abstract] OR "computed tomography"[Title/Abstract] OR "ct imaging"[Title/Abstract] OR "cbct imaging"[Title/Abstract])</p> <p>Filter: "Humans"</p> |
| Medline  | <p>#1 (alveolar bone):ti,ab,kw<br/> #2 (alveolar plate):ti,ab,kw<br/> #3 (alveolar shelf):ti,ab,kw<br/> #4 (buccal bone):ti,ab,kw<br/> #5 (buccal plate):ti,ab,kw<br/> #6 (buccal shelf):ti,ab,kw<br/> #7 (facial bone):ti,ab,kw<br/> #8 (facial plate):ti,ab,kw<br/> #9 (facial shelf):ti,ab,kw<br/> #10 (bundle bone):ti,ab,kw<br/> #11 (alveolar crest):ti,ab,kw<br/> #12 (alveolar ridge):ti,ab,kw<br/> #13 (alveolar bone thickness):ti,ab,kw<br/> #14 (alveolar bone width):ti,ab,kw<br/> #15 (alveolar plate thickness):ti,ab,kw<br/> #16 (alveolar plate width):ti,ab,kw</p>                                                                                                                                                                                                                                                                                                                                                                                                                                                                                                                                                                                                                                                                                                                                                                                                                                                                                                                                                                                                                                                                                                                                                                                                                                                                                                                                                                                                                                                                                                                                                                                                                                                                                                                                                                                                                                                                                                                                                                                                                                                                                                                                                                                                                                                                                                                                                                                                                                                                                                                                                                                                                                                                                                                                                                                                            |

#17 (alveolar shelf thickness):ti,ab,kw  
#18 (alveolar shelf width):ti,ab,kw  
#19 (buccal bone thickness):ti,ab,kw  
#20 (buccal bone width):ti,ab,kw  
#21 (buccal plate thickness):ti,ab,kw  
#22 (buccal plate width):ti,ab,kw  
#23 (buccal shelf thickness):ti,ab,kw  
#24 (buccal shelf width):ti,ab,kw  
#25 (facial bone thickness):ti,ab,kw  
#26 (facial bone width):ti,ab,kw  
#27 (facial plate thickness):ti,ab,kw  
#28 (facial plate width):ti,ab,kw  
#29 (facial shelf thickness):ti,ab,kw  
#30 (facial shelf width):ti,ab,kw  
#31 (bundle bone thickness):ti,ab,kw  
#32 (bundle bone width):ti,ab,kw  
#33 (alveolar crest thickness):ti,ab,kw  
#34 (alveolar crest width):ti,ab,kw  
#35 (alveolar ridge thickness):ti,ab,kw  
#36 (alveolar ridge width):ti,ab,kw  
#37 #1 OR #2 OR #3 OR #4 OR #5 OR #6 OR #7 OR #8 OR #9 OR #10 OR #11 OR #12 OR #13 OR #14 OR #15 OR #16 OR #17 OR #18 OR #19 OR #20  
OR #21 OR #22 OR #23 OR #24 OR #25 OR #26 OR #27 OR #28 OR #29 OR #30 OR #31 OR #32 OR #33 OR #34 OR #35 OR #36  
#38 (Tooth):ti,ab,kw  
#39 (teeth):ti,ab,kw  
#40 (Maxilla\*):ti,ab,kw  
#41 (Mandib\*):ti,ab,kw  
#42 (Incisor):ti,ab,kw  
#43 (Canine):ti,ab,kw  
#44 (Premolar):ti,ab,kw  
#45 (Molar):ti,ab,kw  
#46 #38 OR #39 OR #40 OR #41 OR #42 OR #43 OR #44 OR #45  
#47 (cone beam computed tomography):ti,ab,kw  
#48 (CT):ti,ab,kw  
#49 (CBCT):ti,ab,kw  
#50 (Tomography):ti,ab,kw  
#51 (Computed tomography):ti,ab,kw  
#52 (CT imaging):ti,ab,kw  
#53 (CBCT imaging):ti,ab,kw  
#54 #47 OR #48 OR #49 OR #50 OR #51 OR #52 OR #53  
#55 #37 AND #46 AND #54

**Table S3.** Risk of bias analysis.

| Study                  | Randomization | Blinding | Appropriate and clearly focused question of the Study | Defined criteria for<br>1. Inclusion<br>2. Exclusion | Appropriate No. of patients | Conflict of interest (COI) was stated | Source of Funding | Risk of bias |
|------------------------|---------------|----------|-------------------------------------------------------|------------------------------------------------------|-----------------------------|---------------------------------------|-------------------|--------------|
| <b>Adiguzel 2017</b>   | NA            | NA       | Yes                                                   | 1. Yes<br>2. Yes                                     | 113                         | No COI claimed                        | NA                | High         |
| <b>Al-Jandan 2013</b>  | No            | NA       | Yes                                                   | 1. Yes<br>2. Yes                                     | 50                          | No COI claimed                        | No                | High         |
| <b>AlMasri 2015</b>    | Yes           | NA       | Yes                                                   | 1. Yes<br>2. No                                      | 16                          | No COI claimed                        | No                | High         |
| <b>AlTarawneh 2017</b> | NA            | NA       | Yes                                                   | 1. Yes<br>2. Yes                                     | 120                         | No COI claimed                        | NA                | High         |
| <b>Amid 2017</b>       | NA            | NA       | Yes                                                   | 1. Yes<br>2. Yes                                     | 144                         | NA                                    | No                | High         |
| <b>Behnia 2015</b>     | Yes           | NA       | Yes                                                   | 1. Yes<br>2. No                                      | 18                          | No COI claimed                        | NA                | High         |
| <b>Botelho 2020</b>    | NA            | NA       | Yes                                                   | 1. Yes<br>2. Yes                                     | 87                          | No COI claimed                        | NA                | High         |
| <b>Chen 2017</b>       | NA            | NA       | Yes                                                   | 1. Yes<br>2. Yes                                     | 16                          | No COI claimed                        | Funded            | High         |
| <b>D'Silva 2019</b>    | NA            | NA       | Yes                                                   | 1. Yes<br>2. Yes                                     | 66                          | No COI claimed                        | NA                | High         |
| <b>Demircan 2015</b>   | NA            | NA       | Yes                                                   | 1. Yes<br>2. Yes                                     | 60                          | NA                                    | NA                | High         |
| <b>El Nahass 2013</b>  | NA            | NA       | Yes                                                   | 1. Yes<br>2. Yes                                     | 93                          | NA                                    | NA                | High         |
| <b>Eraydin 2017</b>    | Yes           | NA       | Yes                                                   | 1. Yes<br>2. Yes                                     | 24                          | No COI claimed                        | No                | Moderate     |
| <b>Farahamnd 2017</b>  | Yes           | NA       | Yes                                                   | 1. Yes<br>2. Yes                                     | 132                         | NA                                    | NA                | Moderate     |
| <b>Foosiri 2018</b>    | Yes           | NA       | Yes                                                   | 1. Yes<br>2. Yes                                     | 51                          | No COI claimed                        | No                | Moderate     |
| <b>Gakonyo 2018</b>    | NA            | NA       | Yes                                                   | 1. Yes<br>2. Yes                                     | 184                         | No COI claimed                        | NA                | High         |
| <b>Ganji 2017</b>      | No            | NA       | Yes                                                   | 1. Yes<br>2. Yes                                     | 32                          | No COI claimed                        | No                | High         |
| <b>Gluckman 2017</b>   | NA            | Yes      | Yes                                                   | 1. Yes<br>2. Yes                                     | 150                         | NA                                    | NA                | High         |
| <b>Januário 2011</b>   | NA            | NA       | Yes                                                   | 1. Yes<br>2. No                                      | 250                         | NA                                    | NA                | High         |
| <b>Jin 2005</b>        | No            | NA       | Yes                                                   | 1. Yes<br>2. Yes                                     | 66                          | NA                                    | NA                | High         |
| <b>Kheur 2015</b>      | No            | Yes      | Yes                                                   | 1. Yes                                               | 150                         | No COI claimed                        | No                | Moderate     |

|                           |     |     |     |                  |     |                                                 |        |          |
|---------------------------|-----|-----|-----|------------------|-----|-------------------------------------------------|--------|----------|
|                           |     |     |     | 2. Yes           |     |                                                 |        |          |
| <b>Khoury 2016</b>        | NA  | NA  | Yes | 1. No<br>2. Yes  | 47  | No financial interest<br>claimed                | NA     | High     |
| <b>Lau 2011</b>           | Yes | NA  | Yes | 1. Yes<br>2. Yes | 170 | NA                                              | NA     | High     |
| <b>Lee 2019</b>           | NA  | NA  | Yes | 1. Yes<br>2. Yes | 20  | No COI claimed                                  | No     | High     |
| <b>Lin 2018</b>           | NA  | NA  | Yes | 1. Yes<br>2. Yes | 21  | No COI claimed                                  | Funded | High     |
| <b>López-Jarana 2018</b>  | NA  | Yes | Yes | 1. Yes<br>2. Yes | 49  | No COI claimed                                  | Funded | Moderate |
| <b>Matsuda 2016</b>       | NA  | Yes | Yes | 1. Yes<br>2. Yes | 95  | No financial interest<br>claimed                | NA     | Moderate |
| <b>Nahás-Scocate 2014</b> | No  | NA  | Yes | 1. Yes<br>2. Yes | 30  | NA                                              | NA     | High     |
| <b>Nowzari 2010</b>       | Yes | NA  | Yes | 1. Yes<br>2. Yes | 101 | NA                                              | Funded | Moderate |
| <b>Nucera 2017</b>        | Yes | Yes | Yes | 1. Yes<br>2. Yes | 30  | NA                                              | NA     | Low      |
| <b>Park 2014</b>          | NA  | NA  | Yes | 1. Yes<br>2. Yes | 20  | No COI claimed                                  | NA     | High     |
| <b>Pascual 2017</b>       | NA  | NA  | Yes | 1. No<br>2. Yes  | 15  | No COI claimed                                  | NA     | High     |
| <b>Porto 2019</b>         | NA  | NA  | Yes | 1. Yes<br>2. Yes | 422 | No COI claimed                                  | Funded | High     |
| <b>Ramanauskaite 2020</b> | NA  | NA  | Yes | 1. Yes<br>2. No  | 60  | No COI claimed                                  | Funded | High     |
| <b>Rojo-Sanchis 2017</b>  | NA  | NA  | Yes | 1. Yes<br>2. Yes | 44  | No COI claimed                                  | NA     | High     |
| <b>Sendyk 2015</b>        | NA  | NA  | Yes | 1. Yes<br>2. No  | 35  | No COI claimed                                  | NA     | High     |
| <b>Shrestha 2019</b>      | Yes | NA  | Yes | 1. Yes<br>2. Yes | 146 | No COI claimed                                  | Funded | Moderate |
| <b>Temple 2015</b>        | NA  | NA  | Yes | 1. Yes<br>2. Yes | 265 | No COI claimed                                  | NA     | High     |
| <b>Üner 2019</b>          | NA  | NA  | Yes | 1. No<br>2. Yes  | 160 | No COI claimed                                  | No     | High     |
| <b>Wang 2014</b>          | NA  | NA  | Yes | 1. Yes<br>2. No  | 300 | No COI claimed                                  | Funded | High     |
| <b>Yoshimine 2012</b>     | NA  | NA  | Yes | 1. No<br>2. Yes  | 30  | No COI claimed                                  | No     | High     |
| <b>Younes 2015</b>        | Yes | NA  | Yes | 1. Yes<br>2. Yes | 21  | COI claimed: col-<br>laboration agree-<br>ments | Funded | High     |

|                    |     |    |     |                  |     |                |        |          |
|--------------------|-----|----|-----|------------------|-----|----------------|--------|----------|
| <b>Yuan 2018</b>   | NA  | NA | Yes | 1. No<br>2. No   | 40  | NA             | NA     | High     |
| <b>Zahedi 2018</b> | NA  | NA | Yes | 1. No<br>2. Yes  | 170 | No COI claimed | NA     | High     |
| <b>Zekry 2012</b>  | Yes | NA | Yes | 1. Yes<br>2. Yes | 200 | No COI claimed | NA     | Moderate |
| <b>Zhang 2015</b>  | Yes | NA | Yes | 1. Yes<br>2. Yes | 105 | No COI claimed | Funded | Moderate |
